# Supplementary material
Source: PubMed Central journal article supplement (PMC8902576)
Supplement: ajtr0014-0831-f7.pdf [file ajtr0014-0831-f7.pdf]

## Role of TRIM24 in CRC

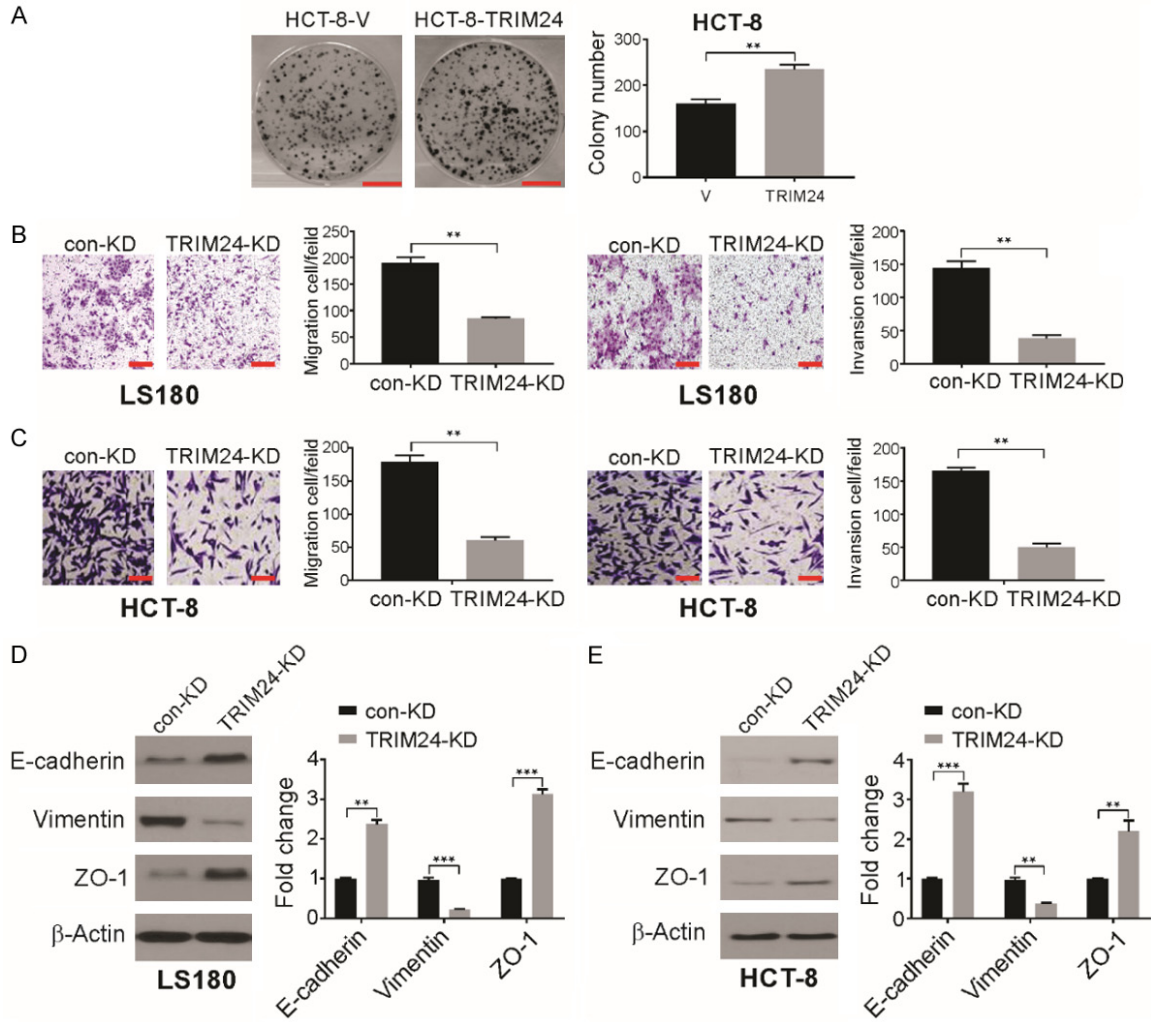

**Figure S1.** A. Colony forming abilities of HCT-8 cells were analyzed following TRIM24 overexpression. Scale bar: 1 cm. B. LS180 cells were transfected with sh con or sh *TRIM24*, Cell migration (Left) and invasion (Right) were determined by Matrigel transwell assay. Scale bar: 50  $\mu$ m. C. HCT-8 cells were transfected with sh con or sh *TRIM24*, and cell migration (Left) and invasion (Right) were determined by Matrigel transwell assay. Scale bar: 50  $\mu$ m. D. LS180 cells were transfected with sh con or sh *TRIM24*. The indicated protein level was detected by western blotting and normalized to  $\beta$ -actin. E. HCT-8 cells were transfected with sh con or sh *TRIM24*. The indicated protein level was detected by western blotting and normalized to  $\beta$ -actin.

## Role of TRIM24 in CRC

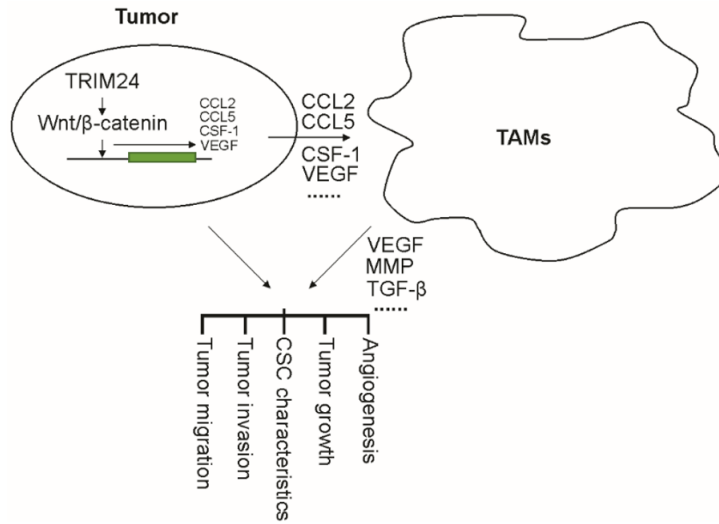

**Figure S2. A.** Mode for oncogenic activities of TRIM24. TRIM24 overexpression promotes expression and release of CCL2, CCL5, CSF-1, VEGF etc. through the Wnt/β-catenin signaling pathway. TAMs were recruited into tumor microenvironment and play a key role in promoting tumor angiogenesis, growth, invasion, migration and CSC characteristics.

**Figure 1E**

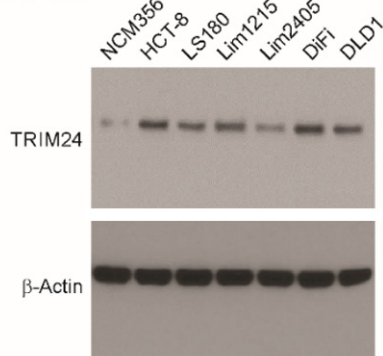

**Figure 2F**

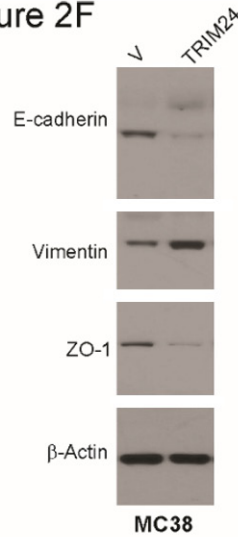

**Figure 2G**

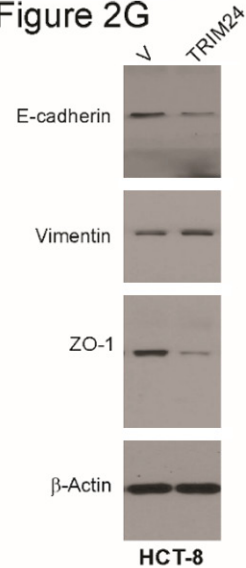

Figure 3C

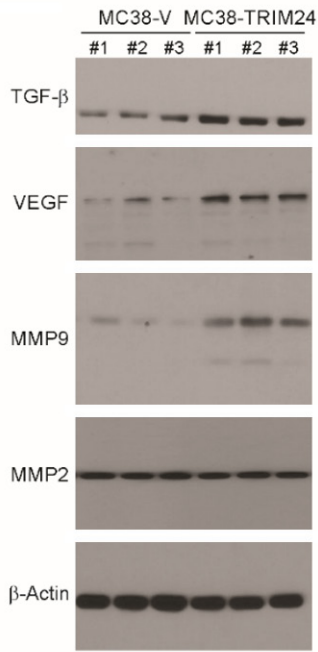

Figure 3E

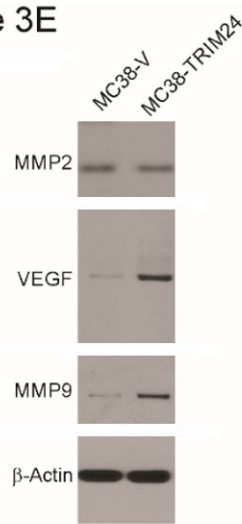

Figure 4A

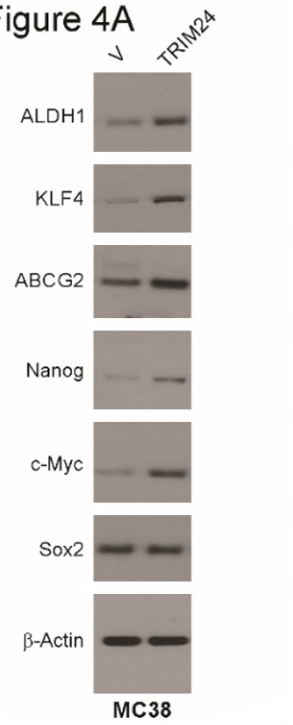

Figure 5A

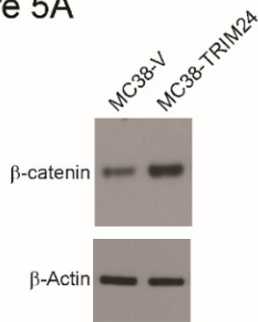

Figure 5C

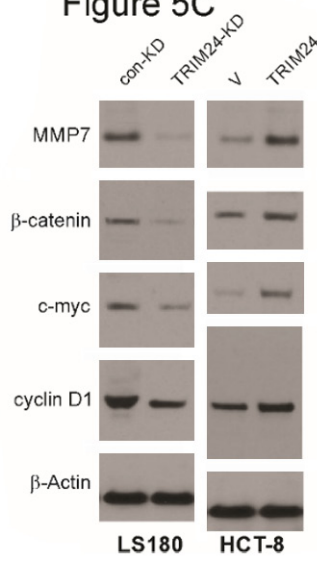

Figure 5D

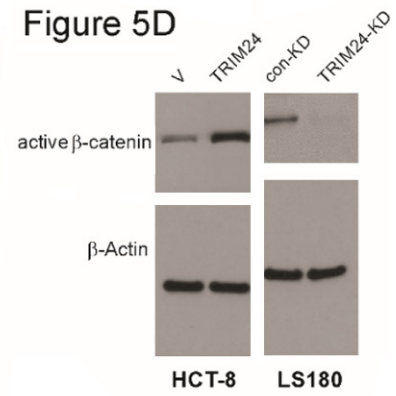

Figure S3. Uncropped western blot images.

Figure 6D

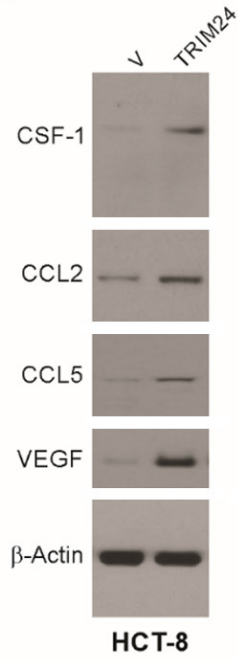

Figure 6F

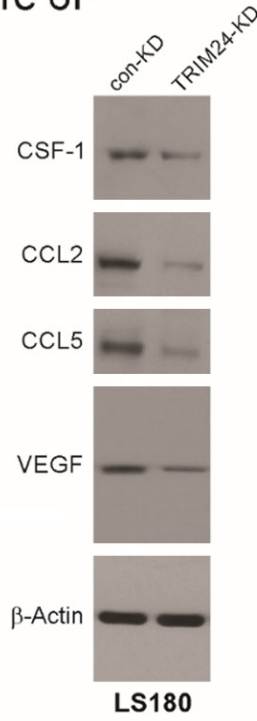

Figure 6H

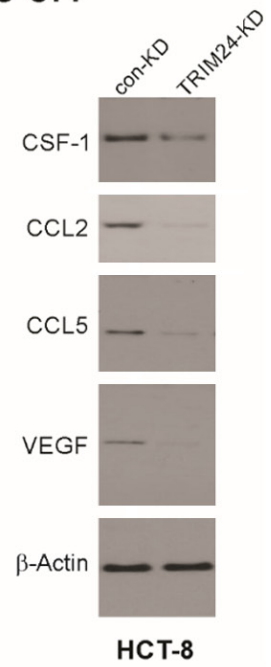

Figure S1D

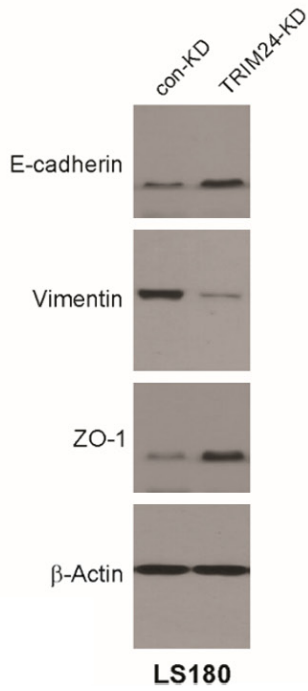

Figure S1E

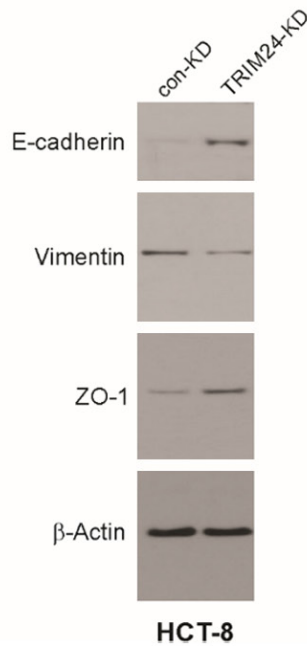

Figure S4. Uncropped western blot images.
